# Supplementary material for: Resequencing PNMT in European hypertensive and normotensive individuals: no common susceptibilily variants for hypertension and purifying selection on intron 1
Source: PubMed Central journal article supplement (PMC1947951; doi:10.1186/1471-2350-8-47), 2007-07-23
Supplement: 1471-2350-8-47-S1.pdf [file 1471-2350-8-47-S1.pdf]

## Additional files

### *Additional file 1*

File format: .pdf

Title and description of the data:

Nucleotide sequence alignment of human *PNMT* and rat *Pnmt* genes. Exons of the gene are boxed. mRNA start site is marked with +1. Translation start site is indicated by **ATG** (red/bold) and **red** arrow; **translation end sites** for human and rat are in purple/bold. Seven **SNPs** identified by resequencing *PNMT* in this study are marked bold with grey shading. The sequence of human-specific *AluSp element* in the first intron is marked in italics and its start/end sites are indicated by **black** arrows. Sequences of regulatory elements and transcription factor binding sites (TFBS) are underlined. Experimentally confirmed **rat *Pnmt* expression regulating elements** [6, 59-62] are typed in *italics* on green shading background. Predicted regulatory elements for human *PNMT* [12-13] are typed with regular font (no shading).

*hPNMT* 1 TTCAGGAAGACCACGGAGATGCCACAGGCAGAATTGGCTTCCCATCTGGGAGATAGGTGG  
*rPnmt* 1 -----CT.CAGCCC..T..G.--..A.T.C..G..C..

*hPNMT* 61 GGAGACCCTGGCATTTTGACAGCCAGAACCTGGGGTGCTGAGCAGAATCTTCATGCCTGG  
*rPnmt* 33 .A....AAGCA....A..-TGC.AG.C....A.A.CA.CA...G.G.C..GA.G...A..

*hPNMT* 121 CCTGGCCGCCTTCGGAGGGAAAGCTGGAGGGTTGGGTGCGAGAGGAGTGGGGTCAGAGCCC  
*rPnmt* 92 ..CT...AA..C.CC..T.GGA.A...T.-...AC.--...G..T.G.....G.AG.ATG

*hPNMT* 181 CTACATCCGCAGGACCCCAAATCGGCTGGGCCCAAGGCCCGGAC-TGCGCT-CCCCGGT  
*rPnmt* 149 -----.....GT..TCT.C.T.TGAAAAA....AAAGT.CG.A.....G..T.T..

*hPNMT* 239 GGCCCCGGCGGCCCT-CCGCGAATGCGTCCCTGCCCTGCCCAAGCCCTCTGCCCT  
*rPnmt* 201 A.TGG.T.T...AG.A..AA.....T..T....-----A.T.....TT..

*hPNMT* 298 CACCCGGGTCCGGCGCCGCCCGCAAGTGGCGGGAACAACCCGAACCCGAACCTTCTGTG  
*rPnmt* 246 T..A..A.....T.T--...T..CC...TA.....CTT.....T--.....-A.G

*hPNMT* 358 CTCGGGAGCCCCAGATAAGCGGCTGGGAACCCGCGGGGCCGCAGGGGAGGCCCGGCTG  
*rPnmt* 297 ..T.CCG.A..T.....A..GCAT.G...-A.....A.....-T.....A..

*hPNMT* 418 TTCCGCCCGCTAAGTGCATTAG-CACAGCTCACCTCCCCTATCGCGCCTGCCATCGGACG  
*rPnmt* 355 ...T..TT.....AA.....A.C.CA.....G---...T.TG.....AA.T.

*hPNMT* 477 GGCAGTGCCGCGCCCTGCTCTGGGGCCCCCGGAGCGACCACAGCGGAGGCCGGAACGGAC  
*rPnmt* 412 CT.G.G..A.A.A.....-A.TA...A.-.C...AGA.A.....A...A..G

*hPNMT* 537 TGTCCTTTCTGGGGCGGGTGGGGAGGGGGTGTGCTGGAGGGCCCGGTGGCATAGCAAC  
*rPnmt* 468 .....AA.GA..A.A.A..C.....-----

*hPNMT* 597 GGACGAGAGAGCCCTGGAGGAGGGGCGGGGAGGGGGGAGTTGTGTGGCAGTTCTAAGGGAA  
*rPnmt* 499 -----.....T.....T....-----A.....-GA...A.A.G

*hPNMT* 657 GGGTGGGTGCTGGGACGGGTGTCCGGGAGGGAGGGGAGCCTGGCGGGTCTGGGGCCTCG  
*rPnmt* 534 ...A.TT..T--A.A...AC..C.AGA..G.A....-----

*hPNMT* 717 TCGCGGAGGGCGCTGCGAGGGGAAACTGGGGAAAGGGCCTAATTCCCCAGTCTCCACCT  
*rPnmt* 570 C..G.A...AT....G..TC.....CA..A.-----T..CTCAG....

*hPNMT* 777 CGAATCAGGAAAGAGAAGGGGCGGGCTGCTGGGCAAAAAGAGGTGAATGGCTGCGGGGGGGC  
*rPnmt* 614 ----.TG.....AT...A.....A.GCTG..C.-.G.--...T..A...

*hPNMT* 837 TGGAGAAGAGAGATGGGAGGGGCCGGCCGGGGGTGAGGGGGTCTAAAGATTGTGGGG  
*rPnmt* 667 .....G...TC.-...G.CCA.T.--AA.T.A..CTG....AG.AG.GC.GCACT..A

*hPNMT* 897 GTGAGGAACTGAGGGTGGGGGCGCCAGAGCGGGACTCGGGGCGGGGACAGGCGAGGCG  
*rPnmt* 724 .C..TC..-----A..C.AT.A...T..A-----...TT.T.A.--C

*hPNMT* 957 GAGGGCGAGGGCTGCGGGAGCAAGTACGGAGCCGGGGGTGTGGGGGAGCATTGCCCTGC  
*rPnmt* 761 A..A.TA.A.----.A....TGG.-G.A.GAG..AT.T.C.AAA..G..CCCT..A.AT.

*hPNMT* 1017 AGCCGCCGCCCACTCACCTCCGGTGTGTCTGCAGCCCGGACACTAAGGGAGATGGATGA  
*rPnmt* 816 TC..C..T...G.C.-.G.GC..CC...C.GC..T.A.....CT.....-

*hPNMT* 1077 ATGGGTGGGGAGGATGCGGCGCACATGGCCCCGGGCGGCTCGGCGGTCAGCTGCCCCCC  
*rPnmt* 874 --.....ACAGA...T....GC.TC...G..TCATCC...A..A.C..C.CA..C.TGT

*hPNMT* 1137 CACAGCGGA--CCGGTCGGGGCGGGGG---TCGGGCGGTAGAAAAAGGGCCGCGAGGCG  
*rPnmt* 932 G.TG.A..GGT.T..G....G..A..GGAC.CA.TA....T...G..ATG.G...TT



*hPNMT* 1192 AGCGGGGCACTGGGCGGACCGCGGCGGCAGC**ATG**AGC---GGCGCAGACCGTAGCCCCAA  
*rPnmt* 992 .....A.--A.A.....-..T.AA.A.G.....GA.CGT...T.....CG.AG.A..C  
**+1 rat exon 1**

*hPNMT* 1249 TCGGGGCGCAGCCCCTGACTCGGCCCGGGCCAGGCGGCGGTGGCTTCGGCCTACCAGCG  
*rPnmt* 1049 ...A..GATG.A.T.....C.A..T.....A.A..C..C.T..T.....

*hPNMT* 1309 CTTCGAGCCGCGCGCCTACCTCCGCAACAACACTACGCGCCCCCTCGGGGGACCTGTGCAA  
*rPnmt* 1109 ...T.....C..T.....T.....T.....A...

*hPNMT* 1369 CCCGAACGGCGTTCGGGCGGCTGGAAGCTGCGCTGCTTGGCGCAGACCTTCGCCACCGGTGA  
*rPnmt* 1169 ...TG.T..T..G.....T.....T.....A...A..AGT...T.....)....

*hPNMT* 1429 GCGGGGAAACTGAGGCACGAGGACAAGAGGTCGTCGGGGAGTGAAAGCAGGCGCAGGG  
*rPnmt* 1229 ..ACT.....A.....A..GC...A..A.A..A.A.....-----G...

*hPNMT* 1489 AAATAAAAAGAAGGAAAGGGAGACAGACCAGGCGCCTAACAGATGGGGACCAAGAAACAA  
*rPnmt* 1282 .G.G.G...C...A-----T.TGC.C..A.....A.C.A...GC.

*hPNMT* 1549 GAGATAGCTGAGAGGTGCAAACAGAAGAGAAAAAGGAGCAACATCCCTTAGGAGAGGGGC  
*rPnmt* 1325 ..AC..T---.GT...T.GC.G.C.C.A.C.-----

*hPNMT* 1609 AGAGGAGAGAGAGGTGGAGAGAGGGGGCGGAGAGTGCTCAGAATTGAGAGCTAAGGTGGG  
*rPnmt* 1354 -----A.....CGA.AG...----...GCTA...G..AT..

*hPNMT* 1669 GGATGCAGGACAGACTGAGGTGGAGATGCATAGGAGGAAATGGAGGCAGATGTGGGACAG  
*rPnmt* 1387 ...G..-----T.....C.---A.T..T..A..CC.G.

*hPNMT* 1729 GGGTGAGAAACTCCAGGATTTCTCGCTGAGCCTGGCTGGTAGGTATAGTTGTTTTCTTT  
*rPnmt* 1419 AAT..GA.G...-----A..A.ACAACT..A--.G..CT...

 **Alu sequence**

*hPNMT* 1789 CTTTTTCTTTATTTTATTTTCAATTTATTTACTTATTTTATTTTATTTTATTTGTTTTGAGAC  
*rPnmt* 1455 .....-----

*hPNMT* 1849 GGAGTTTCGCTCTTGTTGCCAGGCTGGAGTACAATGGCGCCATCTCGGCTCACTGCAAC  
*rPnmt* 1459 -----.....G.-----

GRE

*hPNMT* 1909 CTCCGCCTCCCCGGTTCAAGCGATTCTTGCCTCAGCTTCCCTAGTAGCTGGGATTAC  
*rPnmt* 1470 -----...T.A.AG..GAGAGAC..A.....CC-T

*hPNMT* 1969 AGGCATGCGCCCCCATGCCTGGCTAATTTATTTGTATTTTATTTAGTAGAGACGGGACTTCTC  
*rPnmt* 1499 G..AGA....-----GAGG.G..T....-----

*hPNMT* 2029 CATGTTGGTCAGGCTGGTCTCGAACTCCCAACCTTAGGATCCACCCACCCCGGCTCCCA  
*rPnmt* 1524 ---.....--..A...-----..

*hPNMT* 2089 AAGTGCTGGGATTACAGGTGTGAGCCACTGCGCCCGGCCAGTAGGTATAGTCTTCTAGAT  
*rPnmt* 1537 ...A.A-.A.GC.C...-----C..T...

**Alu sequence** 

*hPNMT* 2149 GTGAAACCTGAGTCTCAGAGCGGTGAAGTTCCTTCCGAAGGGCAGCCCATGTTGGAGCT  
*rPnmt* 1560 ..C..G---.GA....-----...CA.TA..TT.T.A.-----A.....

*hPNMT* 2209 GGGTTCAGTCTAACTCTGGGGCCAATGCTTTTTCCAGATGGAGACACATTTGCAGAGGAG  
*rPnmt* 1597 A.T...T---.GTG....AA..CGA.T-----....C.CTG.CA...C-----

*hPNMT* 2269 AAGGAAGAACTAGAGAGAGGCAGGAGATGCAGGGGAGGGAAGGGTAAGGAGGCAGGGGC  
*rPnmt* 1642 ----...TG..G.G...-----C.C.AG..A.....GT..C.---.....AA.

exon 2

*hPNMT* 2329 TGCCTGGGCTGGCTGGCACCAGGACCCCTCTTCTCTGCCCTGCCAGGTGAAGTGTCCGG  
*rPnmt* 1688 CC....ATA.-----C.C.....T..A.-..)....G.....T..

*hPNMT* 2389 ACGCACCCTCATCGACATTGGTTCAGGCCCCACCGTGTACCAGCTGCTCAGTGCCTGCAG  
*rPnmt* 1731 ..AGGT.....T.....C..C.....A.A.....C.....TGC

*hPNMT* 2449 CCTTTGAGGACATCACCATGACAGATTTCTGGAGGTCAACCGCCAGGAGCTGGGGCC  
*rPnmt* 1791 .....C.....C..T.....G.....A.T

*hPNMT* 2509 CTGGCTGCAGGAGGAGCCGGGGCCTTCAACTGGAGCATGTACAGCCAACATGCCTGCCT  
*rPnmt* 1851 .....GA....A..A..A.....G.....TG...T....G...T.....

*hPNMT* 2569 CATTGAGGGCAAGGGGTAAGGACTGGGGGTGAGGGTTGGGGAGGAGGCTTCCCATAGAG  
*rPnmt* 1911 ..C...A......G..A.....C--.G.A.C.TCAC.C.GA.TG.-----G.

*hPNMT* 2629 TGGCTGGTTG-GGGCAACAGAGGCCTGAGCGT--AGAACAGCCTTGAGCCCTGCCTTGTG  
*rPnmt* 1963 C..G..C.G.A....GGAG...A.....C.CTG.GGT..T.-.....C.....

**exon 3**

*hPNMT* 2686 CCTCCTGCACAGGGAATGCTGGCAGGATAAGGAGCGCCAGCTGCGAGCCAGGGTGAAACG  
*rPnmt* 2022 ..C....T....A..G.C.....G..A..A.....C....G.....G..

*hPNMT* 2746 GGTCCTGCCCATCGACGTGCACCAGCCCCAGCCCCTGGGTGCTGGGAGCCCAGCTCCCCT  
*rPnmt* 2082 A...T.....T..T.....A.....A...TC.G...TG..A....

*hPNMT* 2806 GCCTGCTGACGCCTGGTCTCTGCCTTCTGCTTGGAGGCTGTGAGCCCAGATCTTGCCAG  
*rPnmt* 2142 .....T.....C.....G....CC.A..

*hPNMT* 2866 CTTTCAGCGGGCCCTGGACCACATCACCACGCTGCTGAGGCCTGGGGGGCACCTCCTCCT  
*rPnmt* 2202 ..C.G..A...TT..T..T....G.....C....TA.T.....T.

*hPNMT* 2926 CATCGGGGCCCTGGAGGAGTCGTGGTACCTGGCTGGGGAGGCCAGGCTGACGGTGGTGCC  
*rPnmt* 2262 .....T.....AT.T....T..

*hPNMT* 2986 AGTGTCTGAGGAGGAGGTGAGGGAGGCCCTGGTGCCTAGTGGCTACAAGGTCCGGGACCT  
*rPnmt* 2322 .....A.....CT.....T..TG.....A....

*hPNMT* 3046 CCGCACCTATATCATGCCTGCCACCTTCAGACAGGCGTAGATGATGTCAAGGGCGTCTT  
*rPnmt* 2382 T.....C.....C.GC..G..T..G....C.....TA....

*hPNMT* 3106 CTTCGCCTGGGCTCAGAAGGTTGGGCTGTGAGGGCTGTACCTGGTGCCTGTGGCCCCCA  
*rPnmt* 2442 ...T.....C.....A.A.A.G..CAG.T.-----..AG..T.CA.-----TTG

*hPNMT* 3166 CCCACCTGGATTCCCTGTTCTTTGAAGTGGCACCTAATAAAGAAATAATACCCTGCCGCT  
*rPnmt* 2490 ..TC...A-.C...T.A.CACCC.....T..C.G.C...A..TAT-

*hPNMT* 3226 GCGGTCAGTGCTGTGTGGCTCTCCTGGGAAGCAGCAAGGGCCCAGAGATCTGAGTGTC  
*rPnmt* 2548 ---...T.....T....A.....A.AC.CA..G.TA..AAA..GTC..C...-CT

*hPNMT* 3286 CGGGTAGGGGAGACATTCACCCTAGGCTTTTTTCCAGAAGCTTCCTTGAGGCTAGCATT  
*rPnmt* 2604 TA.AAG.AACCA.TCC.AG.TT.TTCT...GCC.T.....C.T.G...A.GCT..T..

*hPNMT* 3346 CTGTACCACTCATCTTCCCAAATAAGGAAGGCCAAGGTCAGGGGAGCTCACCGGGCAC  
*rPnmt* 2664 ....G....C.....C...TCC.C.G.-----...C..CAC.CA.GTG..A...G.

*hPNMT* 3406 CTGCAGTGCACCAGGCACTTGTGATATGCCATTGTGTC  
*rPnmt* 2717 T..TGTG.TT.TC.A.CTGCAG.C.-..A.GCT..AG
